# Supplementary material for: Comprehension and Use of Nutrition Facts Tables among Adolescents and Young Adults in Canada
Source: Atypon-hosted journal article supplement (doi:10.3148/cjdpr-2015-042), 2016-01-15

**Supplementary Figure 1.** Comparing information on Nutrition Facts labels. Categorization of responses to the comparison question: “Looking at products A and B, which product do you think would be the best option for someone trying to eat fewer calories?”, by Nutrition Facts table condition, accuracy of response, and explanation for having arrived at that response.

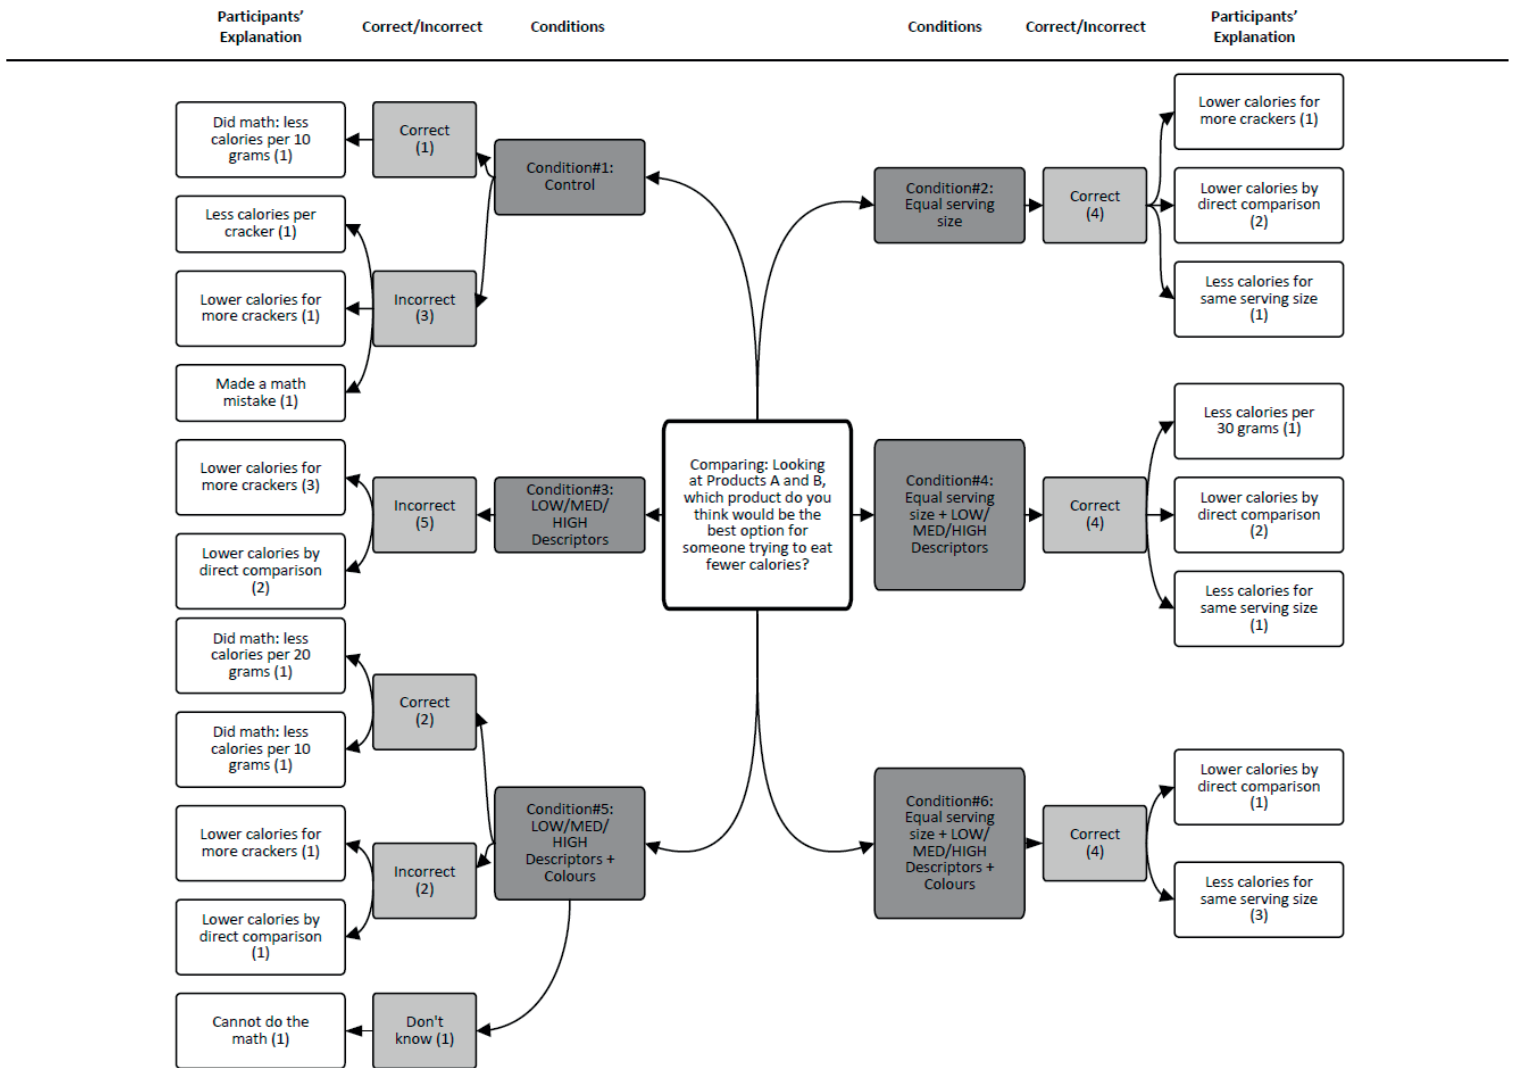

Supplement: cjdpr-2015-042supplfig1.pdf [file cjdpr-2015-042supplfig1.pdf]
