# Supplementary material for: Comprehension and Use of Nutrition Facts Tables among Adolescents and Young Adults in Canada
Source: Atypon-hosted journal article supplement (doi:10.3148/cjdpr-2015-042), 2016-01-15
Supplement: cjdpr-2015-042suppltab1.pdf [file cjdpr-2015-042suppltab1.pdf]

**O Table 1. Themes and categories describing participants' thought processes for arriving at responses on 9 functional items.**

| Functional Items                                                                       | Condition                         | Total correct (n) | Themes/Categories – “Explanations for Correct Responses”        | Total incorrect/ don't know (n) | Themes/Categories – “Explanations for Incorrect Responses”                                   |
|----------------------------------------------------------------------------------------|-----------------------------------|-------------------|-----------------------------------------------------------------|---------------------------------|----------------------------------------------------------------------------------------------|
| <b><i>Interpreting nutrition information on NFTs</i></b>                               |                                   |                   |                                                                 |                                 |                                                                                              |
| Does Product A have a little, moderate amount, or a lot of sodium?                     | 1 – current NFT                   | 1                 | • Made a subjective guess                                       | 3                               | • Did not understand that %DV can be used to determine the amount of a nutrient in a product |
|                                                                                        | 2 - equal SS                      | 4                 | • Compared to other product                                     | 0                               |                                                                                              |
|                                                                                        | 3 – simple descriptors            | 2                 | • Applied simple descriptors or colour coding of %DV            | 3                               | • Made a subjective guess                                                                    |
|                                                                                        | 4 – equal SS + simple descriptors | 4                 |                                                                 | 0                               | • Compared to other product                                                                  |
|                                                                                        | 5 – colour coding                 | 2                 |                                                                 | 3                               | • Ignored interpretational aids                                                              |
|                                                                                        | 6 – equal SS + colour coding      | 4                 |                                                                 | 0                               |                                                                                              |
| True/False: You should try to get 100% of the daily value for saturated fat every day. | 1 - current NFT                   | 2                 | • Understood to limit intake of negative nutrients              | 2                               | • Perceived 100%DV as the government recommended amount per day for all nutrients            |
|                                                                                        | 2 - equal SS                      | 1                 | • Identified saturated fat is a negative nutrient               | 3                               | • Did not understand saturated fat is a negative nutrient and intake should be limited       |
|                                                                                        | 3 – simple descriptors            | 4                 |                                                                 | 1                               |                                                                                              |
|                                                                                        | 4 – equal SS + simple descriptors | 2                 |                                                                 | 2                               |                                                                                              |
|                                                                                        | 5 – colour coding                 | 3                 |                                                                 | 2                               |                                                                                              |
|                                                                                        | 6 – equal SS + colour coding      | 3                 |                                                                 | 1                               |                                                                                              |
| True/False: You should try to get 100% of the Daily value for calcium every day.       | 1 - current NFT                   | 3                 | • Perceived 100%DV as the government recommended amount per day | 1                               | • Believed calcium is not necessary for healthy development                                  |
|                                                                                        | 2 - equal SS                      | 4                 | • Identified calcium as a positive nutrient                     | 0                               | • Did not understand %DV                                                                     |
|                                                                                        | 3 – simple descriptors            | 5                 |                                                                 | 0                               |                                                                                              |
|                                                                                        | 4 – equal SS + simple descriptors | 3                 |                                                                 | 1                               |                                                                                              |
|                                                                                        | 5 – colour coding                 | 4                 |                                                                 | 1                               |                                                                                              |
|                                                                                        | 6 – equal SS + colour coding      | 3                 |                                                                 | 1                               |                                                                                              |

**Defining nutrition information on NFts**

|                                                                                                |                                   |   |                                                                                                                                                                                                    |   |                                                                                                                                                                                                             |
|------------------------------------------------------------------------------------------------|-----------------------------------|---|----------------------------------------------------------------------------------------------------------------------------------------------------------------------------------------------------|---|-------------------------------------------------------------------------------------------------------------------------------------------------------------------------------------------------------------|
| Looking at Product B, what does 2% daily value of Vitamin A mean to you?                       | 1 - current NFt                   | 4 | <ul style="list-style-type: none"> <li>• Understood that concept of %DV</li> </ul>                                                                                                                 | 0 | <ul style="list-style-type: none"> <li>• Perceived 2% of crackers to contain Vitamin A</li> <li>• Uncertain of the health benefits of Vitamin A</li> <li>• Did not understand the concept of %DV</li> </ul> |
|                                                                                                | 2 - equal SS                      | 3 |                                                                                                                                                                                                    | 1 |                                                                                                                                                                                                             |
|                                                                                                | 3 – simple descriptors            | 5 |                                                                                                                                                                                                    | 0 |                                                                                                                                                                                                             |
|                                                                                                | 4 – equal SS + simple descriptors | 3 |                                                                                                                                                                                                    | 1 |                                                                                                                                                                                                             |
|                                                                                                | 5 – colour coding                 | 2 |                                                                                                                                                                                                    | 3 |                                                                                                                                                                                                             |
|                                                                                                | 6 – equal SS + colour coding      | 2 |                                                                                                                                                                                                    | 2 |                                                                                                                                                                                                             |
| True/False: You can use the percent daily value in the Nutrition Facts table to compare foods. | 1 - current NFt                   | 4 | <ul style="list-style-type: none"> <li>• Understood that %DV information can be used to compare nutrients across foods</li> <li>• Recognized the importance of comparable serving sizes</li> </ul> | 0 | <ul style="list-style-type: none"> <li>• Believed “mass” not %DV is used to compare foods</li> <li>• Did not recognize the limitations of using %DV when serving sizes are not relatively equal</li> </ul>  |
|                                                                                                | 2 - equal SS                      | 3 |                                                                                                                                                                                                    | 1 |                                                                                                                                                                                                             |
|                                                                                                | 3 – simple descriptors            | 5 |                                                                                                                                                                                                    | 0 |                                                                                                                                                                                                             |
|                                                                                                | 4 – equal SS + simple descriptors | 4 |                                                                                                                                                                                                    | 0 |                                                                                                                                                                                                             |
|                                                                                                | 5 – colour coding                 | 3 |                                                                                                                                                                                                    | 2 |                                                                                                                                                                                                             |
|                                                                                                | 6 – equal SS + colour coding      | 4 |                                                                                                                                                                                                    | 0 |                                                                                                                                                                                                             |

**Comparing nutrition information on NFts**

|                                                                                                                                                                                  |                                   |   |                                                                                                                                                                                                                   |   |                                                                                                                                                                                                                                                                                                                                   |
|----------------------------------------------------------------------------------------------------------------------------------------------------------------------------------|-----------------------------------|---|-------------------------------------------------------------------------------------------------------------------------------------------------------------------------------------------------------------------|---|-----------------------------------------------------------------------------------------------------------------------------------------------------------------------------------------------------------------------------------------------------------------------------------------------------------------------------------|
| Looking at products A and B, which product do you think would be the best option for someone who is trying to reduce the risk of blood pressure by lowering their sodium intake? | 1 - current NFt                   | 4 | <ul style="list-style-type: none"> <li>• Directly compared nutrients between products</li> <li>• Consulted serving size before comparing</li> <li>• Applied simple descriptors or colour coding of %DV</li> </ul> | 0 | <ul style="list-style-type: none"> <li>• Did not consult serving size information when comparing between products</li> <li>• Considered the household measure of serving size (e.g., 7 crackers) but not the metric measure (e.g., 30g)</li> </ul>                                                                                |
|                                                                                                                                                                                  | 2 - equal SS                      | 4 |                                                                                                                                                                                                                   | 0 |                                                                                                                                                                                                                                                                                                                                   |
|                                                                                                                                                                                  | 3 – simple descriptors            | 3 |                                                                                                                                                                                                                   | 2 |                                                                                                                                                                                                                                                                                                                                   |
|                                                                                                                                                                                  | 4 – equal SS + simple descriptors | 4 |                                                                                                                                                                                                                   | 0 |                                                                                                                                                                                                                                                                                                                                   |
|                                                                                                                                                                                  | 5 – colour coding                 | 5 |                                                                                                                                                                                                                   | 0 |                                                                                                                                                                                                                                                                                                                                   |
|                                                                                                                                                                                  | 6 – equal SS + colour coding      | 4 |                                                                                                                                                                                                                   | 0 |                                                                                                                                                                                                                                                                                                                                   |
| Looking at products A and B, which product do you think would be the best option for someone trying to eat fewer calories?                                                       | 1 - current NFt                   | 1 | <ul style="list-style-type: none"> <li>• Directly compared nutrients between products</li> <li>• Consulted serving size before manipulating nutrition information</li> </ul>                                      | 3 | <ul style="list-style-type: none"> <li>• Did not consult serving size information when comparing between products</li> <li>• Considered the household measure of serving size (e.g., 7 crackers) but not the metric measure (e.g., 30g)</li> <li>• Math issue - Made a math error or perceived the math as too complex</li> </ul> |
|                                                                                                                                                                                  | 2 - equal SS                      | 4 |                                                                                                                                                                                                                   | 0 |                                                                                                                                                                                                                                                                                                                                   |
|                                                                                                                                                                                  | 3 – simple descriptors            | 0 |                                                                                                                                                                                                                   | 5 |                                                                                                                                                                                                                                                                                                                                   |
|                                                                                                                                                                                  | 4 – equal SS + simple descriptors | 4 |                                                                                                                                                                                                                   | 0 |                                                                                                                                                                                                                                                                                                                                   |
|                                                                                                                                                                                  | 5 – colour coding                 | 2 |                                                                                                                                                                                                                   | 3 |                                                                                                                                                                                                                                                                                                                                   |
|                                                                                                                                                                                  | 6 – equal SS + colour coding      | 4 |                                                                                                                                                                                                                   | 0 |                                                                                                                                                                                                                                                                                                                                   |

| <b>Manipulating nutrition information on NFts</b>                                                          |                                   |   |                                                                                                                                                                                    |   |                                                                                                                                                                                                                                                                                                                                          |
|------------------------------------------------------------------------------------------------------------|-----------------------------------|---|------------------------------------------------------------------------------------------------------------------------------------------------------------------------------------|---|------------------------------------------------------------------------------------------------------------------------------------------------------------------------------------------------------------------------------------------------------------------------------------------------------------------------------------------|
| How many servings of product B would you have to eat in order to get all the fibre you need in one day?    | 1 - current NFt                   | 3 | <ul style="list-style-type: none"> <li>• Understood the concepts of “serving size” and %DV</li> <li>• Able to correctly mathematically manipulate nutrition information</li> </ul> | 1 | <ul style="list-style-type: none"> <li>• Did not understand the concept of %DV - Unaware that %DV can be used to determine the recommended amount per day of fibre</li> <li>• Did not understand the concept of “servings” and “serving size”</li> <li>• Math issue - Made math error when manipulating nutrition information</li> </ul> |
|                                                                                                            | 2 - equal SS                      | 2 |                                                                                                                                                                                    | 2 |                                                                                                                                                                                                                                                                                                                                          |
|                                                                                                            | 3 – simple descriptors            | 5 |                                                                                                                                                                                    | 0 |                                                                                                                                                                                                                                                                                                                                          |
|                                                                                                            | 4 – equal SS + simple descriptors | 2 |                                                                                                                                                                                    | 2 |                                                                                                                                                                                                                                                                                                                                          |
|                                                                                                            | 5 – colour coding                 | 2 |                                                                                                                                                                                    | 3 |                                                                                                                                                                                                                                                                                                                                          |
|                                                                                                            | 6 – equal SS + colour coding      | 2 |                                                                                                                                                                                    | 2 |                                                                                                                                                                                                                                                                                                                                          |
| If you consume half a box of Product A, what percentage of the daily value of total fat would you consume? | 1 - current NFt                   | 3 | <ul style="list-style-type: none"> <li>• Understood the concepts of “serving size” and %DV</li> <li>• Able to correctly mathematically manipulate nutrition information</li> </ul> | 1 | <ul style="list-style-type: none"> <li>• Did not understand the concept of %DV</li> <li>• Made mathematical error when manipulating nutrition information</li> <li>• Perceived math and effort too much</li> </ul>                                                                                                                       |
|                                                                                                            | 2 - equal SS                      | 3 |                                                                                                                                                                                    | 1 |                                                                                                                                                                                                                                                                                                                                          |
|                                                                                                            | 3 – simple descriptors            | 4 |                                                                                                                                                                                    | 1 |                                                                                                                                                                                                                                                                                                                                          |
|                                                                                                            | 4 – equal SS + simple descriptors | 3 |                                                                                                                                                                                    | 1 |                                                                                                                                                                                                                                                                                                                                          |
|                                                                                                            | 5 – colour coding                 | 4 |                                                                                                                                                                                    | 1 |                                                                                                                                                                                                                                                                                                                                          |
|                                                                                                            | 6 – equal SS + colour coding      | 1 |                                                                                                                                                                                    | 3 |                                                                                                                                                                                                                                                                                                                                          |

312 Abbreviations: SS = Serving Size; %DV = Percent Daily Value
